# Supplementary material
Source: MDPI journal article supplement (https://www.mdpi.com/2073-4441/15/1/135)
Supplement: s1 [file s1 › water-2060856-supplementary.pdf]

## Supplementary Material

### For

## Thyroid-disrupting effects of cadmium and mercury in zebrafish embryos/larvae

Liqiao Zhong <sup>1,†</sup>, He Zhang <sup>2,†</sup>, Luyin Wu <sup>1</sup>, Huijun Ru <sup>1</sup>, Nian Wei <sup>1</sup>, Fan Yao <sup>1</sup>, Zhaohui Ni <sup>1</sup>, Xinbin Duan <sup>1,\*</sup> and Yunfeng Li <sup>1,\*</sup>

<sup>1</sup> Fishery Resources and Environmental Science Experimental Station of the Upper-Middle Reaches of Yangtze River (Ministry of Agriculture and Rural Affairs), Yangtze River Fisheries Research Institute, Chinese Academy of Fishery Sciences, Wuhan 430223, China

<sup>2</sup> Zhejiang Provincial Key Lab for Subtropical Water Environment and Marine Biological Resources Protection, College of Life and Environmental Science, Wenzhou University, Wenzhou 325035, China

\* Correspondence: duan@yfi.ac.cn (X.D.); lyf086@yfi.ac.cn (Y.L.);  
Tel.: +86-27-81780131 (X.D.); +86-27-81780050 (Y.L.);  
Fax: +86-27-81780088 (Y.L.)

† These authors contributed equally to this work.

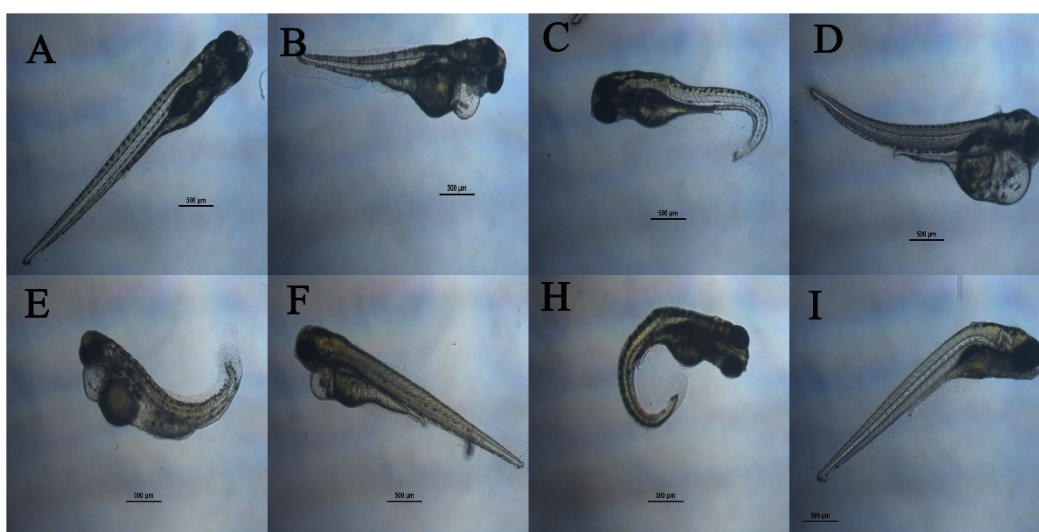

**Figure S1.** Morphology of zebrafish larvae exposure to  $Cd^{2+}$  and  $Hg^{2+}$ . Normal zebrafish larvae (A); the morphological changes caused by  $Cd^{2+}$  (B–D), including yolk sac edema (B), tail malformation (C), and yolk sac edema and pericardial edema (D); the morphological changes caused by  $Hg^{2+}$  (E–I), including tail malformation (E), yolk sac edema (I), pericardial edema (H) and spinal curvature (I).
